# Supplementary material for: How to account for the uncertainty from standard toxicity tests in species sensitivity distributions: an example in non-target plants
Source: bioRxiv or medRxiv preprint supplement (doi:10.1101/2020.07.02.183863), 2020-07-03
Supplement: Supplementary file [file media-3.pdf]

# How to account for the uncertainty from standard toxicity tests in species sensitivity distributions: an example in non-target plants

Sandrine Charles

Dan Wu

Virginie Ducrot

29 June 2020

Contact: [sandrine.charles@univ-lyon1.fr](mailto:sandrine.charles@univ-lyon1.fr)

S1 Table: Corresponding species and common names to the EPPO code

| EPPO code | Species name             | Common name        |
|-----------|--------------------------|--------------------|
| ALLCE     | Allium cepa              | Onion              |
| AVESA     | Avena sativa             | Oat                |
| BEAVA     | Beta vulgaris            | Sugar beet         |
| BRSNW     | Brassica napus winter    | Oilseed rape       |
| BRSOL     | Brassica oleracea        | Cabbage            |
| CUMSA     | Cucumis sativus          | Cucumber           |
| FAGES     | Fagopyrum esculentum     | Buckwheat          |
| GLXMA     | Glycine max              | Soybean            |
| HELAN     | Helianthus annuus        | Sunflower          |
| LOLPE     | Lolium perenne           | Perennial ryegrass |
| LYPES     | Solanum lycopersicum     | Tomato             |
| RAPSR     | Raphanus sativus         | Radish             |
| TRZAW     | Triticum aestivum winter | Winter wheat       |
| ZEAMA     | Zea mays subs. Amylacea  | Corn               |
