# Supplementary material for: How to account for the uncertainty from standard toxicity tests in species sensitivity distributions: an example in non-target plants
Source: bioRxiv or medRxiv preprint supplement (doi:10.1101/2020.07.02.183863), 2020-07-03
Supplement: Supplementary file [file media-4.pdf]

# How to account for the uncertainty from standard toxicity tests in species sensitivity distributions: an example in non-target plants

Sandrine Charles

Dan Wu

Virginie Ducrot

29 June 2020

Contact: [sandrine.charles@univ-lyon1.fr](mailto:sandrine.charles@univ-lyon1.fr)

S2 Table: Formulation of active substances in seven products

| Product number | Chemical family                                                        | Mode of action                                                                       |
|----------------|------------------------------------------------------------------------|--------------------------------------------------------------------------------------|
| 1              | Diphenylethers + Oxyacetamides<br>+ Pyridinecarboxamides               | Inhibition of carotenoid synthesis<br>+ Inhibition of cell division                  |
| 2              | Pyridinecarboxamides                                                   | Inhibition of carotenoid synthesis                                                   |
| 3              | Benzofuran + Uracil +<br>Carbamate                                     | Inhibition of lipid synthesis +<br>Inhibition of photosynthesis at<br>photosystem II |
| 4              | Sulfonylureas + Phenoxy +<br>Sulfonyl-amino-carbonyl-<br>triazolinones | Synthetic auxin + Inhibition of<br>acetolactate synthase                             |
| 5              | Triazines                                                              | Inhibition of cellulose synthesis                                                    |
| 6              | Sulfonylureas + Sulfonyl-amino-<br>carbonyl-triazolinones              | Inhibition of acetolactate<br>synthase                                               |
| 7              | Sulfonylureas + Sulfonyl-amino-<br>carbonyl-triazolinones              | Inhibition of acetolactate<br>synthase                                               |

*Note:* The proportion of active substances is different between products 6 and 7.
